# Supplementary material
Source: PubMed Central journal article supplement (PMC7476569)

# Supplementary Figure 1

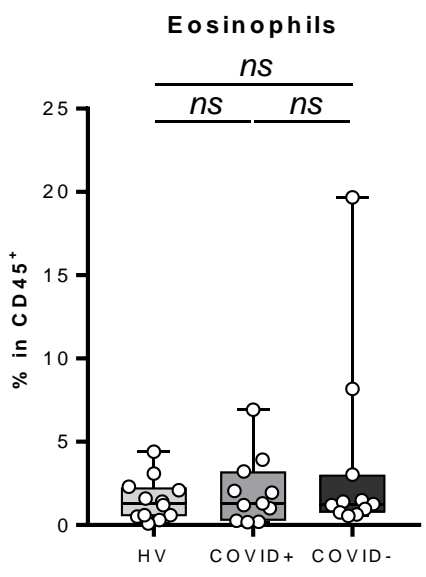

# Supplementary Figure 2

**A**

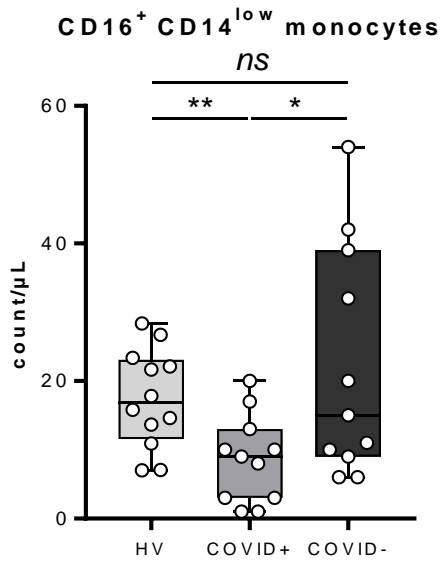

**B**

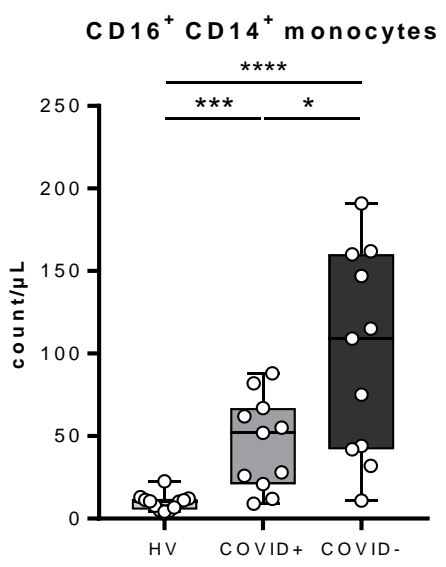

# Supplementary Figure 3

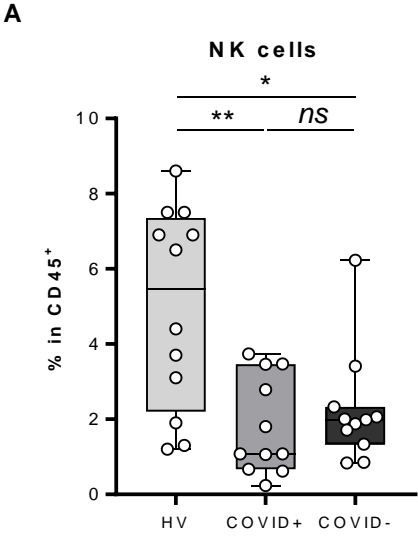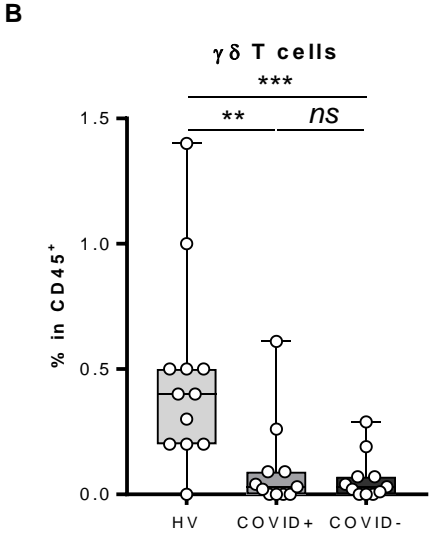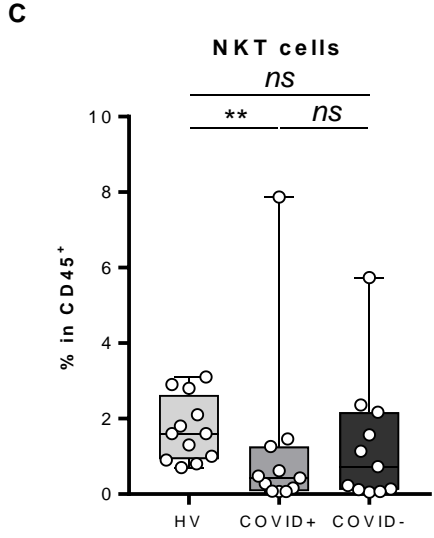

# Supplementary Figure 4

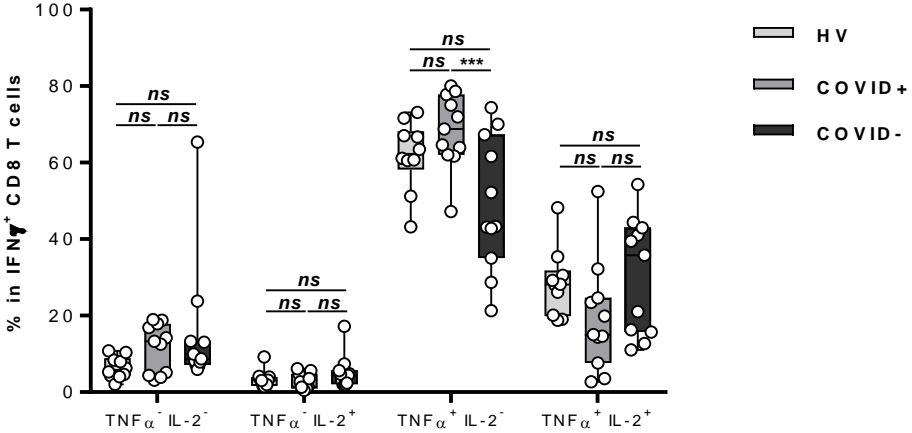

# Supplementary Figure 5

## Neutrophils

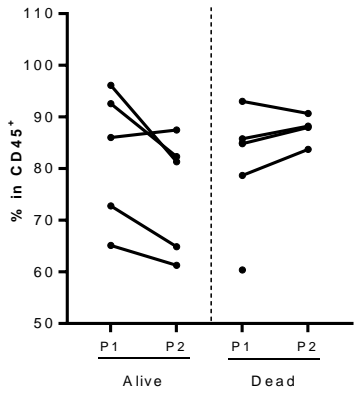

## mMDSC

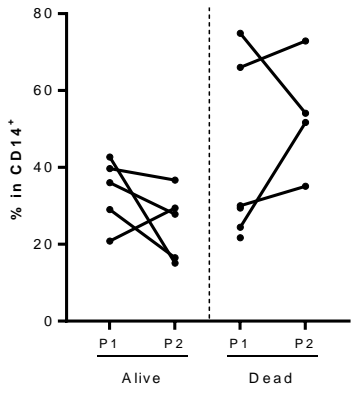

## HLA-DR<sup>high</sup> monocytes

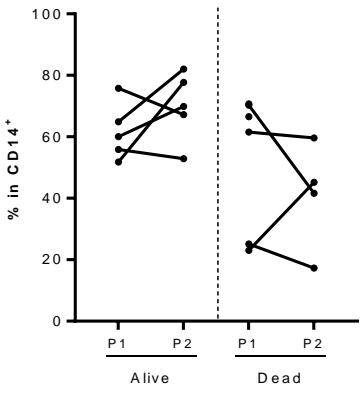

## CD3<sup>+</sup> T cells

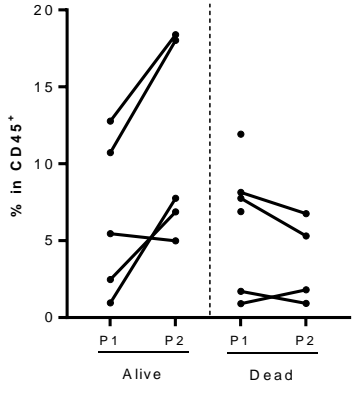

## HLA-DR<sup>+</sup> CD8<sup>+</sup> T cells

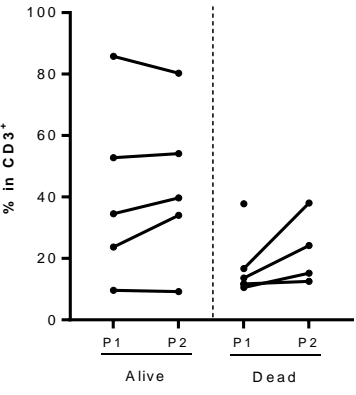

## EMRA CD8<sup>+</sup> T cells

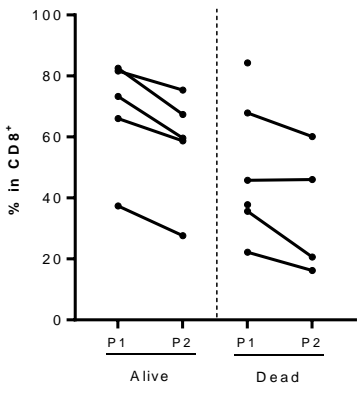

**Supplementary Figure 6**

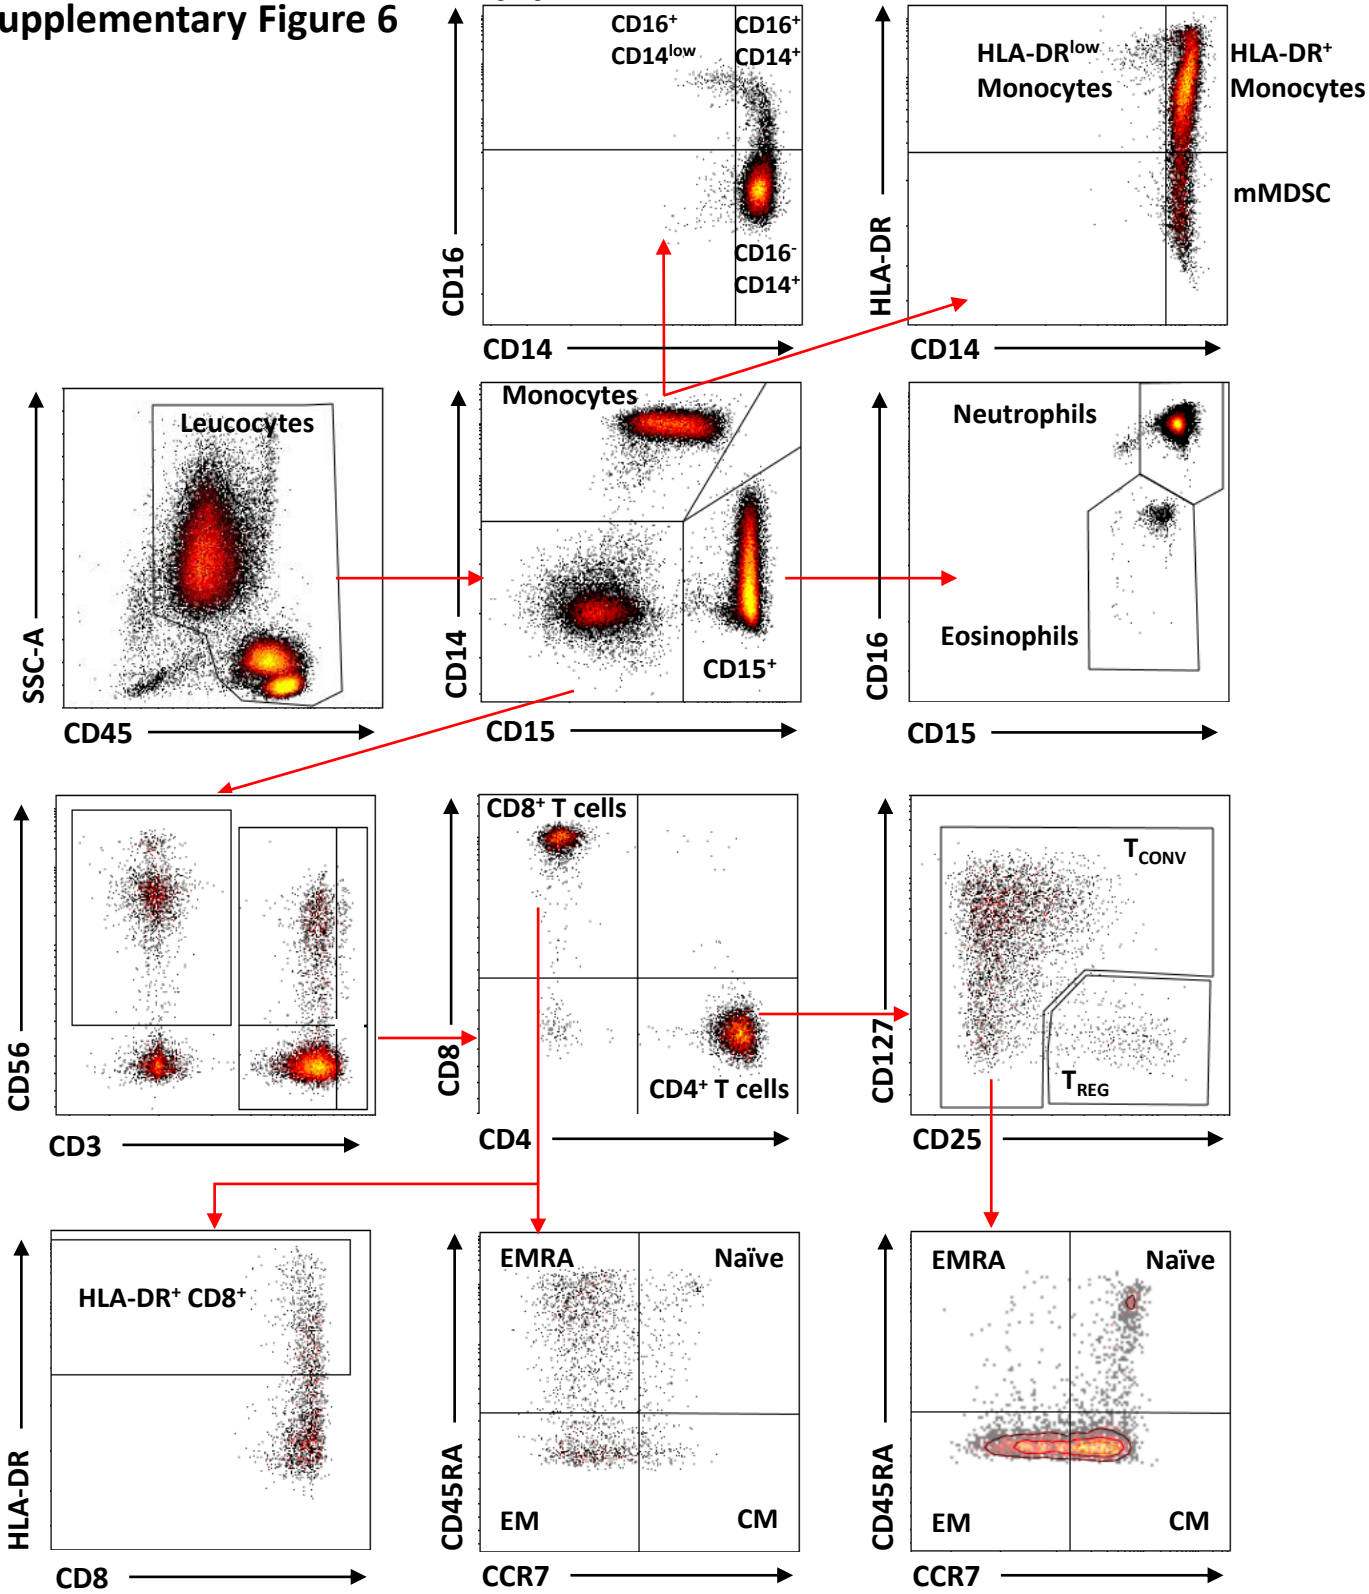

# Supplementary Figure 7

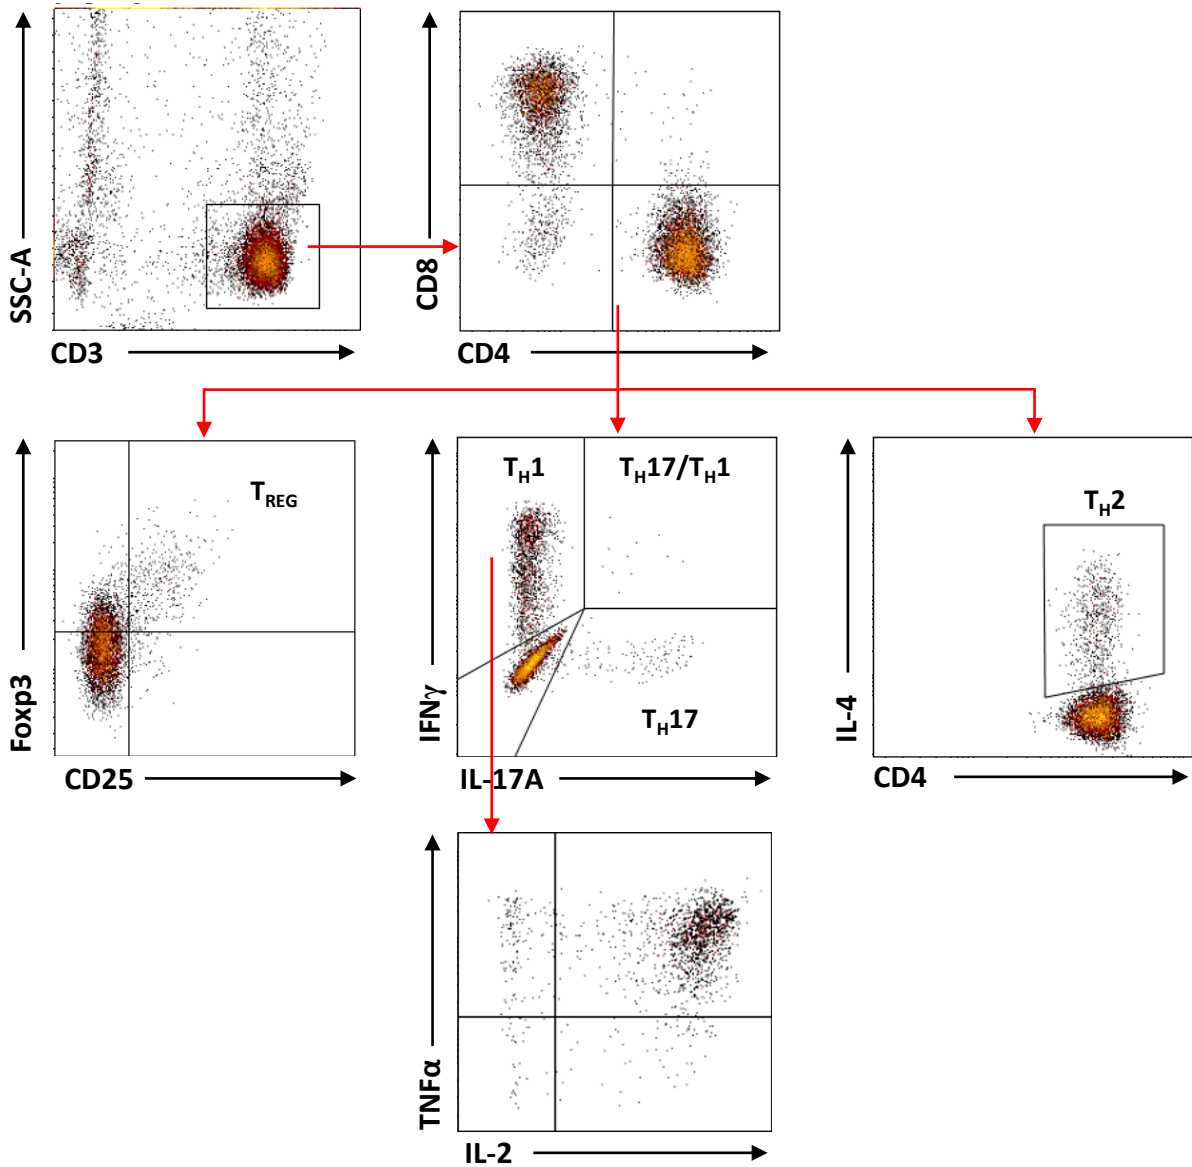

Supplement: mmc1.pdf [file mmc1.pdf]
